# Supplementary material
Source: publisher figshare collection journal article supplement (https://sage.figshare.com/ndownloader/files/44205906)
Supplement: Supplementary file 1 [file 44205906]

## Sheet: Taul1
Supplementary Table 2. PE orientation and PE activity by background variables of the coaches, results of the Chi-square test
	PE Orientation of a coach			PE activity of a coach
	χ2	df	Exact p-value	χ2	df	Exact p-value
Gender
Female	4.875	2	0.086	2.458	2	0.633
Male
Age
Under 35	0.963	2	0.701	1.350	2	0.566
35 and over
Education
Upper secondary or Vocational school education	1.824	2	0.481	0.793	2	0.646
Bachelor’s or Master’s level education
Field of study
Health, sports and welfare	3.600	2	0.206	5.775	2	0.089
Other
Employment status
Permanent employment	2.329	2	0.374	3.845	2	0.170
Other
Coaching education organized by Finnish Ice Hockey Association
Attended	0.222	2	1.000	8.027	2	0.015
Not attended
Team
U8-U11	3.000	4	0.763	5.558	4	0.270
U12-U14
U15-U18
Coaching experience with the current team
Less than a year	0.508	2	0.885	0.227	2	1.000
1 year or more
Overall coaching experience
0-6 years	3.254	2	0.235	15.439	2	0.000
7 years or more
Own icehockey backgroung
1-10 years	1.277	2	0.730	0.436	2	1.000
More than 10 years
df = degrees of freedom
